# Supplementary material
Source: PubMed Central journal article supplement (PMC5039388)

## **Supplementary Materials**

**Table S1. Methylation-specific primers used**

**Table S2. Gene primers used**

**Table S3. Medip-seq data for read alignments in SP and NSP cells in the MS1 cell line**

**Table S4. Information for peak regions between SP and NSP samples**

**Table S5. Numbers of differentially methylated genes between SP and NSP cells in different gene regions**

**Table S6. RNA-seq reads between SP and NSP samples**

**Table S7. Differentially regulated genes showing concomitant changes in mRNA expression and DNA methylation**

**Table S8. GO terms with a p-value less than 0.05**

**Figure S1. Distribution and coverage of peaks in SP and NSP cells in the MS1 cell line.**

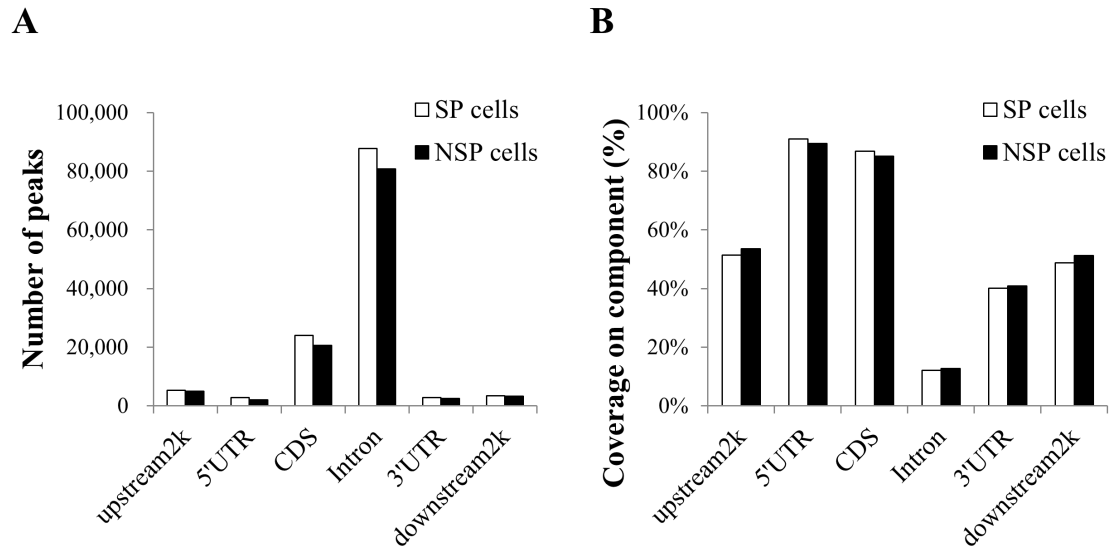

**Figure S2. Differentially methylated genes containing altered methylated sequences in CpG islands.** A total of 10 genes positively correlated with gene expression showed the methylation of CpG islands inside various genomic regions as follows: (A) CDS; (B) downstream 2k; (C) intron; (D) upstream 2k.

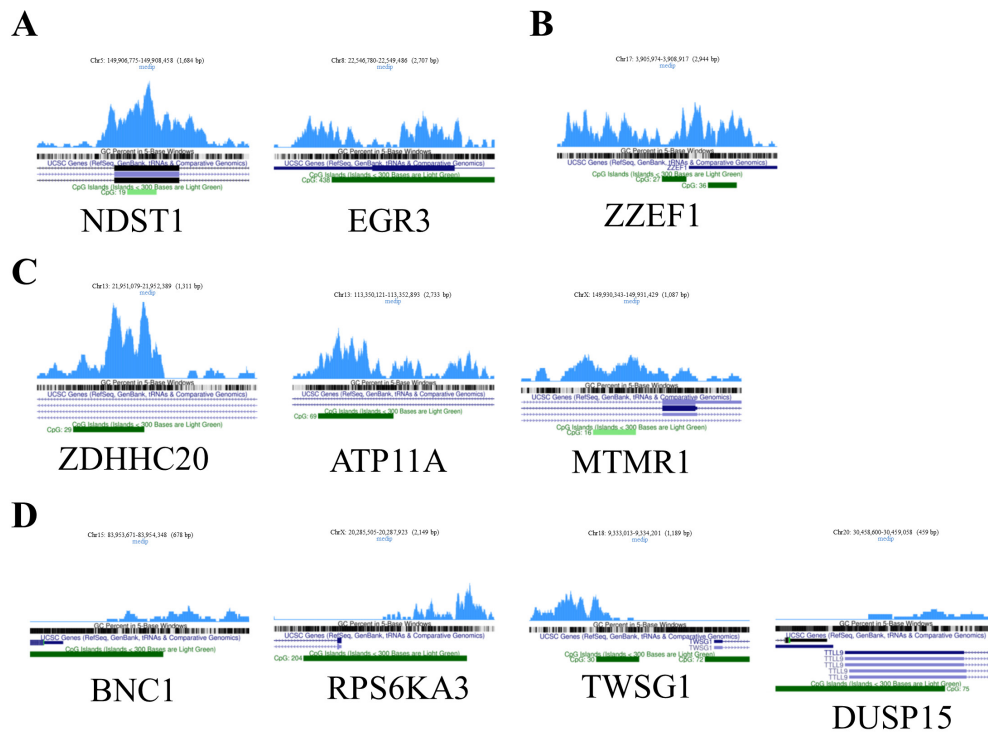

Supplement: jcav07p1668s9.pdf [file jcav07p1668s9.pdf]
